# Supplementary material for: Genomic Characterization of a Novel Alphacoronavirus Isolated from Bats, Korea, 2020
Source: MDPI journal article supplement (doi:10.3390/v13102041), 2021-10-11
Supplement: s1 [file s1]

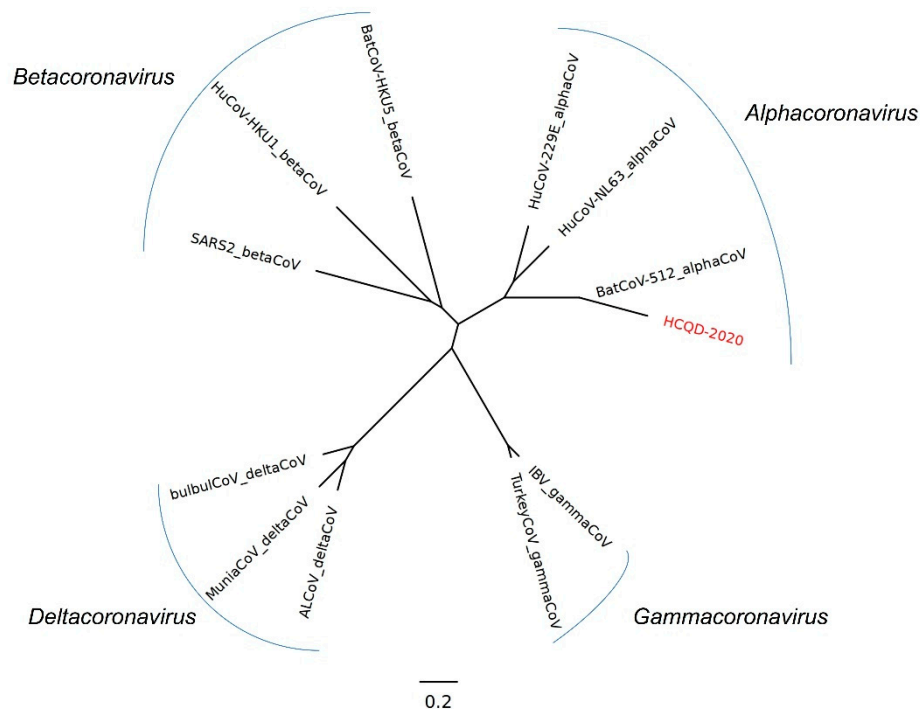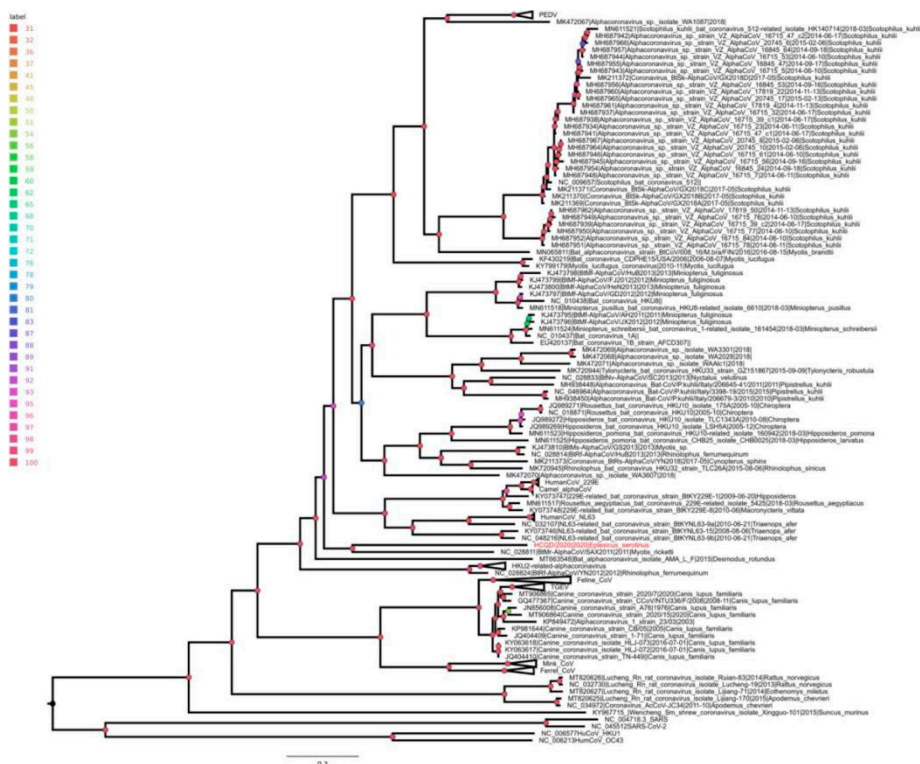

**Table S1.** Information of bat samples collected in this study.

| Bat species                | No of samples | Collection date | Collection location |
|----------------------------|---------------|-----------------|---------------------|
| <i>Eptesicus serotinus</i> | 1             | 20/07/2020      | Gyeongbuk           |
| <i>Myotis aurascens</i>    | 2             | 03/08/2020      | Gyeongbuk           |
| <i>Myotis petax</i>        | 1             | 05/09/2020      | Kangwon             |
| <i>Myotis ikonnikovi</i>   | 1             | 05/09/2020      | Kangwon             |
| <i>Pipstellus abranus</i>  | 1             | 13/09/2020      | Gyeongbuk           |

**Table S2.** List of primers using in this study.

| Primer name | Sequence                     | Ta (°C) | Product size | Reference           |
|-------------|------------------------------|---------|--------------|---------------------|
| Pan-CoF     | GGTGGGACTATCCTAAGTGTGA       | 55      | 440 bp       | Poon et al., (2005) |
| Pan-CoR     | CCATCATCAGATAGAATCATCAT<br>A |         |              |                     |
| Alpha-F     | GCACAAGTGCTTACAGAGGTTG       | 55      | 313 bp       | This study          |
| Alpha-R     | CAACACCGTCATCAGACAGG         |         |              |                     |
