# Supplementary material for: Genomic Characterization of a Novel Alphacoronavirus Isolated from Bats, Korea, 2020
Source: MDPI journal article supplement (doi:10.3390/v13102041), 2021-10-11
Supplement: s1 [file s1]

**Supplement data.** Reference coronavirus using in this study.

| No | Strain                                                                  | Date collection | Host                      | Accession number |
|----|-------------------------------------------------------------------------|-----------------|---------------------------|------------------|
| 1  | Rousettus bat coronavirus                                               | 2014            | Rousettus leschenaulti    | NC_030886.1      |
| 2  | SARS-CoV-2                                                              | 2019            | human                     | NC_045512.2      |
| 3  | Wencheng Sm shrew coronavirus isolate Xingguo-101                       | 2015            | Suncus murinus            | NC_035191.1      |
| 4  | Human coronavirus 229E strain HCoV_229E/Seattle/USA/SC677/2016          | 2016            | Homo sapiens              | KY369909.2       |
| 5  | Rhinolophus affinis bat coronavirus HKU2-related isolate 160660         | 2018            | Rhinolophus affinis       | MN611522.1       |
| 6  | BtRf-AlphaCoV/YN2012                                                    | 2012            | Rhinolophus ferrumequinum | NC_028824.1      |
| 7  | Swine acute diarrhea syndrome coronavirus isolate SADS-CoV/GDWT-P83     | 2018            | Sus scrofa                | MK994937.1       |
| 8  | Camel alphacoronavirus Camel229E isolate Camel229E-CoV/KCSP1/KEN/2015   | 2015            | Camelus dromedarius       | KU291449.1       |
| 9  | Bat coronavirus HKU2 strain HKU2/HK/46/2006                             |                 |                           | EF203065.1       |
| 10 | Bat coronavirus HKU2                                                    |                 |                           | NC_009988.1      |
| 11 | Human coronavirus 229E strain 229E/human/USA/933-50/1993                | 1993            | Homo sapiens              | KF514430.1       |
| 12 | Swine acute diarrhea syndrome coronavirus isolate SADS-CoV-CH-FJWT-2018 | 2018            | Sus scrofa                | MH615810.1       |
| 13 | Alphacoronavirus sp. strain VZ_AlphaCoV_16715_84                        | 2014            | Scotophilus kuhlii        | MH687952.1       |
| 14 | Human coronavirus 229E strain HCoV_229E/Seattle/USA/SC9773/2016         | 2016            | Homo sapiens              | KY369914.1       |
| 15 | Mutant Swine acute diarrhea syndrome coronavirus strain icSADS-tRFP     |                 | Sus scrofa                | MT039232.1       |
| 16 | Human coronavirus 229E strain 229E/Haiti-1/2016                         | 2016            | Homo sapiens              | MF542265.1       |
| 17 | Alphacoronavirus sp. strain VZ_AlphaCoV_17819_22                        | 2014            | Scotophilus kuhlii        | MH687960.1       |
| 18 | Human coronavirus 229E isolate HCoV-229E/USA/UAMS_DID_0108/2017         | 2017            | Homo sapiens              | MT438700.1       |
| 19 | Human coronavirus 229E                                                  |                 |                           | NC_002645.1      |
| 20 | Alpaca respiratory coronavirus isolate CA08-1/2008                      | 2008            | Vicugna pacos             | JQ410000.1       |
| 21 | Camel alphacoronavirus isolate camel/Jeddah/Jd63/2014                   | 2014            | Camelus                   | KT368894.1       |
| 22 | Alphacoronavirus sp. isolate WA3301                                     | 2018            |                           | MK472069.1       |
| 23 | Alphacoronavirus sp. isolate WA2028                                     | 2018            |                           | MK472068.1       |
| 24 | Porcine epidemic diarrhea virus strain USA/OK10240-8/2017               | 2017            | Sus scrofa                | MG334555.1       |
| 25 | Porcine epidemic diarrhea virus genomic RNA, strain: MYG-1/JPN/2014     | 2014            | Sus scrofa domesticus     | LC063838.1       |
| 26 | Human coronavirus NL63 strain HCoV_NL63/Seattle/USA/SC0179/2018         | 2018            | Homo sapiens              | MN306018.1       |
| 27 | Human coronavirus NL63 strain HCoV_NL63/Seattle/USA/SC2940/2015         | 2015            | Homo sapiens              | KY983586.1       |
| 28 | Human coronavirus NL63 strain ChinaGD04                                 | 2018            | Homo sapiens              | MK334047.1       |

|    |                                                                      |      |                                      |             |
|----|----------------------------------------------------------------------|------|--------------------------------------|-------------|
| 29 | Porcine epidemic diarrhea virus strain 85-7-mutant2                  | 2015 |                                      | KX839248.1  |
| 30 | Alphacoronavirus sp. isolate WAAIc1                                  | 2018 |                                      | MK472071.1  |
| 31 | Human coronavirus NL63 strain HCoV_NL63/Seattle/USA/SC0768/2019      | 2019 | Homo sapiens                         | MN306040.1  |
| 32 | Human coronavirus NL63 strain ChinaGD05                              | 2018 | Homo sapiens                         | MK334045.1  |
| 33 | Human coronavirus NL63 isolate Amsterdam 057                         |      |                                      | DQ445911.1  |
| 34 | PRCV ISU-1                                                           |      | Sus scrofa                           | DQ811787.1  |
| 35 | Human Coronavirus NL63                                               |      |                                      | NC_005831.2 |
| 36 | Human group 1 coronavirus associated with pneumonia                  |      |                                      | AY518894.1  |
| 37 | Lucheng Rn rat coronavirus isolate Lijiang-170                       | 2015 | Apodemus chevrieri                   | MT820625.1  |
| 38 | BtMs-AlphaCoV/GS2013                                                 | 2013 | Myotis sp. Rhinolophus ferrumequinum | KJ473810.1  |
| 39 | BtRf-AlphaCoV/HuB2013                                                | 2013 |                                      | NC_028814.1 |
| 40 | Rousettus aegyptiacus bat coronavirus 229E-related isolate 5425      | 2018 | Rousettus aegyptiacus                | MN611517.1  |
| 41 | Tylonycteris bat coronavirus HKU33 strain GZ151867                   | 2015 | Tylonycteris robustula               | MK720944.1  |
| 42 | 229E-related bat coronavirus strain BtKY229E-8                       | 2010 | Macronycteris vittata                | KY073748.1  |
| 43 | Porcine epidemic diarrhea virus strain PEDV/MEX/GTO/02/2016          | 2016 | Sus scrofa                           | MH004412.1  |
| 44 | Porcine epidemic diarrhea virus strain 17GXCZ-1ORF3d                 | 2017 | Sus scrofa                           | MT547179.1  |
| 45 | Coronavirus AcCoV-JC34                                               | 2011 | Apodemus chevrieri                   | NC_034972.1 |
| 46 | Alphacoronavirus sp. strain VZ_AlphaCoV_20745_8                      | 2015 | Scotophilus kuhlii                   | MH687967.1  |
| 47 | Alphacoronavirus sp. strain VZ_AlphaCoV_17819_50                     | 2014 | Scotophilus kuhlii                   | MH687962.1  |
| 48 | Porcine epidemic diarrhea virus isolate 4-2                          | 2013 | Sus scrofa                           | MW165329.1  |
| 49 | Porcine respiratory coronavirus strain OH7269                        | 2014 | Sus scrofa                           | KR270796.1  |
| 50 | Porcine respiratory coronavirus strain PRCV/USA/Minnesota-46140/2016 | 2016 |                                      | KY406735.1  |
| 51 | BtNv-AlphaCoV/SC2013                                                 | 2013 | Nyctalus velutinus                   | NC_028833.1 |
| 52 | Human coronavirus NL63 isolate Kilifi_HH_5402_20-May-2010            | 2010 | Homo sapiens                         | MG428704.1  |
| 53 | 229E-related bat coronavirus strain BtKY229E-1                       | 2009 | Hipposideros                         | KY073747.1  |
| 54 | Porcine epidemic diarrhea virus strain 85-7-mutant4                  | 2015 |                                      | KX839250.1  |
| 55 | Porcine epidemic diarrhea virus isolate JSLS-1/2015                  | 2015 | Sus scrofa                           | KX534205.1  |
| 56 | Alphacoronavirus Bat-CoV/P.kuhlii/Italy/206645-41/2011               | 2011 | Pipistrellus kuhlii                  | MH938448.1  |
| 57 | TGEV Miller M60                                                      | 1987 | Sus scrofa                           | DQ811786.2  |
| 58 | Scotophilus kuhlii bat coronavirus 512-related isolate HK140714      | 2018 | Scotophilus kuhlii                   | MN611521.1  |
| 59 | BtMr-AlphaCoV/SAX2011                                                | 2011 | Myotis ricketti                      | NC_028811.1 |
| 60 | Porcine epidemic diarrhea virus strain AH-                           | 2018 | Sus scrofa                           | MN315264.1  |

| 2018-HF1 |                                                                   |      |                       |             |
|----------|-------------------------------------------------------------------|------|-----------------------|-------------|
| 61       | Porcine epidemic diarrhea virus strain HUA-14PED96                | 2014 | Sus scrofa            | KT941120.1  |
| 62       | Porcine epidemic diarrhea virus isolate CO/P14/IC                 | 2013 | Sus scrofa            | KU558702.1  |
| 63       | Porcine epidemic diarrhea virus strain shxx1902                   | 2019 | Sus scrofa            | MT303066.1  |
| 64       | Porcine epidemic diarrhea virus                                   | 2019 | Sus scrofa            | MT843280.1  |
| 65       | Porcine epidemic diarrhea virus isolate KNU-141112-S DEL2/ORF3    | 2016 | Sus scrofa            | KY825241.1  |
| 66       | Porcine epidemic diarrhea virus strain Italy/7239/2009            | 2009 | Sus scrofa            | KR061458.1  |
| 67       | Ferret systemic coronavirus strain FSCV6                          | 2015 | Mustela putorius furo | KX512810.1  |
| 68       | Porcine epidemic diarrhea virus strain CH/HNQX-3/14               | 2015 | Sus scrofa            | KR095279.1  |
| 69       | Porcine epidemic diarrhea virus isolate KNU-1705                  | 2017 | Sus scrofa            | MH052684.1  |
| 70       | Porcine epidemic diarrhea virus isolate PEDV SH                   | 2016 | Sus scrofa            | MK841494.1  |
| 71       | Alphacoronavirus sp. strain VZ_AlphaCoV_16715_47_c1               | 2014 | Scotophilus kuhlii    | MH687941.1  |
| 72       | Alphacoronavirus sp. isolate WA3607                               | 2018 |                       | MK472070.1  |
| 73       | Porcine epidemic diarrhea virus strain 85-7                       | 2013 | Sus scrofa            | KX839246.1  |
| 74       | Porcine epidemic diarrhea virus isolate KNU-1807                  | 2018 | Sus scrofa            | MH243319.1  |
| 75       | Porcine epidemic diarrhea virus isolate PEDV-Hjms                 | 2015 | Sus scrofa            | KY007139.1  |
| 76       | Porcine epidemic diarrhea virus strain HNAY2016                   |      | Sus scrofa            | MT338518.1  |
| 77       | Porcine epidemic diarrhea virus isolate CH/TP-3-1/2018            | 2018 | Sus scrofa            | MK140812.1  |
| 78       | Porcine epidemic diarrhea virus strain HB2018                     | 2018 | Sus scrofa            | MT166307.1  |
| 79       | Porcine epidemic diarrhea virus isolate GDS09                     | 2014 | Sus scrofa            | MH726408.1  |
| 80       | Porcine epidemic diarrhea virus strain CH/SCMY/2018               | 2018 | Sus scrofa            | MH061343.1  |
| 81       | Porcine epidemic diarrhea virus strain CH/S                       | 1986 | Sus scrofa            | JN547228.1  |
| 82       | Porcine epidemic diarrhea virus isolate KNU-1815                  | 2018 | Sus scrofa            | MK032689.1  |
| 83       | Porcine epidemic diarrhea virus strain USA/IL20697/2014 Passage 5 | 2013 | Sus scrofa            | KT860508.1  |
| 84       | Porcine epidemic diarrhea virus strain virulent DR13              | 2009 | Sus scrofa            | JQ023161.1  |
| 85       | Porcine epidemic diarrhea virus isolate KNU-1710                  | 2017 | Sus scrofa            | MH052689.1  |
| 86       | Bat coronavirus CDPHE15/USA/2006                                  | 2006 | Myotis lucifugus      | NC_022103.1 |
| 87       | Porcine epidemic diarrhea virus strain CH/HNXX/2016               |      | Sus scrofa            | MT338517.1  |
| 88       | Porcine epidemic diarrhea virus strain CH/SCZG/2017               | 2017 | Sus scrofa            | MH061337.1  |
| 89       | Porcine epidemic diarrhea virus strain CH/SCLS/2018               | 2018 | Sus scrofa            | MH061341.1  |

|     |                                                                            |      |            |            |
|-----|----------------------------------------------------------------------------|------|------------|------------|
| 90  | Porcine epidemic diarrhea virus isolate<br>CHSD2014                        | 2014 | Sus scrofa | KX791060.1 |
| 91  | Porcine epidemic diarrhea virus clone<br>VN/JFP1013_1/2013/Vinh An/Vietnam | 2013 | Sus scrofa | KJ960178.1 |
| 92  | Porcine epidemic diarrhea virus isolate<br>CH/TP-4-4/2018                  | 2018 | Sus scrofa | MK140814.1 |
| 93  | Porcine epidemic diarrhea virus isolate<br>SDSX16                          | 2016 | Sus scrofa | MH117940.1 |
| 94  | Porcine epidemic diarrhea virus isolate KNU-<br>1904                       | 2019 | Sus scrofa | MN971595.1 |
| 95  | Porcine epidemic diarrhea virus isolate CT<br>P10                          | 2018 | Sus scrofa | MN114121.1 |
| 96  | Porcine epidemic diarrhea virus strain<br>HeN170821                        | 2017 | Sus scrofa | MK862249.1 |
| 97  | Porcine epidemic diarrhea virus isolate<br>GDS07                           | 2014 | Sus scrofa | MH726370.1 |
| 98  | Porcine epidemic diarrhea virus isolate<br>GDS11                           | 2014 | Sus scrofa | MH726374.1 |
| 99  | Porcine epidemic diarrhea virus isolate<br>GDS27                           | 2014 | Sus scrofa | MH726380.1 |
| 100 | Porcine epidemic diarrhea virus isolate<br>GDS47                           | 2016 | Sus scrofa | MH726382.1 |
| 101 | Porcine epidemic diarrhea virus isolate<br>GDS50                           | 2017 | Sus scrofa | MH726383.1 |
| 102 | Porcine epidemic diarrhea virus isolate<br>GDS31                           | 2015 | Sus scrofa | MH726394.1 |
| 103 | Porcine epidemic diarrhea virus isolate<br>GDS49                           | 2017 | Sus scrofa | MH726406.1 |
| 104 | Porcine epidemic diarrhea virus isolate CH-<br>HB1-2018                    | 2018 | Sus scrofa | MK606368.1 |
| 105 | Porcine epidemic diarrhea virus isolate KNU-<br>1709                       | 2017 | Sus scrofa | MH052688.1 |
| 106 | Porcine epidemic diarrhea virus isolate<br>KUPE21                          | 2001 | Sus scrofa | MF737355.1 |
| 107 | Porcine epidemic diarrhea virus isolate XM2-<br>4                          | 2016 | Sus scrofa | KX812524.1 |
| 108 | Porcine epidemic diarrhea virus strain<br>KB2013-4                         | 2013 | Sus scrofa | KX580953.1 |
| 109 | Porcine epidemic diarrhea virus strain<br>PEDV-LY                          | 2014 | Sus scrofa | KM609210.1 |
| 110 | Porcine epidemic diarrhea virus strain<br>CH/FJZZ-9/2012                   | 2012 | Sus scrofa | KC140102.1 |
| 111 | Porcine epidemic diarrhea virus strain<br>CH/FJND-3/2011                   | 2011 | Sus scrofa | JQ282909.1 |
| 112 | Porcine epidemic diarrhea virus strain LZC<br>from China                   |      |            | EF185992.1 |
| 113 | Porcine epidemic diarrhea virus isolate M3-<br>SX2017                      | 2017 | Sus scrofa | MK644603.1 |
| 114 | Porcine epidemic diarrhea virus strain<br>17GXCZ-1ORF3c                    | 2017 | Sus scrofa | MT547180.1 |
| 115 | Porcine epidemic diarrhea virus isolate N7-<br>GD2017                      | 2017 | Sus scrofa | MK644604.1 |
| 116 | Porcine epidemic diarrhea virus strain B5-                                 | 2017 | Sus scrofa | MF807952.1 |

| HB2017 |                                                                                       |      |                       |             |
|--------|---------------------------------------------------------------------------------------|------|-----------------------|-------------|
| 117    | Porcine epidemic diarrhea virus strain<br>XY2013                                      | 2013 | Sus scrofa            | KR818832.1  |
| 118    | Porcine epidemic diarrhea virus strain<br>PEDV-1C                                     | 2012 | Sus scrofa            | KM609203.1  |
| 119    | Porcine epidemic diarrhea virus strain<br>PEDV-8C                                     |      | Sus scrofa            | KM609205.1  |
| 120    | Alphacoronavirus sp. strain<br>VZ_AlphaCoV_16845_53                                   | 2014 | Scotophilus kuhlii    | MH687956.1  |
| 121    | Porcine epidemic diarrhea virus strain<br>SHXX1902                                    | 2019 | Sus scrofa            | MN841671.1  |
| 122    | UNVERIFIED: Porcine epidemic diarrhea<br>virus strain SX-WH                           | 2018 | Sus scrofa            | MN594506.1  |
| 123    | Porcine epidemic diarrhea virus isolate KNU-<br>1601                                  | 2016 | Sus scrofa            | KY963963.1  |
| 124    | Porcine epidemic diarrhea virus strain GD-<br>XL-2019                                 | 2019 | Sus scrofa            | MN759311.1  |
| 125    | Porcine epidemic diarrhea virus strain<br>CH/SXYL/2016                                | 2016 | Sus scrofa            | MF462814.1  |
| 126    | Porcine epidemic diarrhea virus isolate<br>CH/HBTS/2017                               | 2017 | Sus scrofa            | MH581489.1  |
| 127    | Porcine epidemic diarrhea virus strain GDgh<br>Porcine epidemic diarrhea virus strain |      |                       | MG983755.1  |
| 128    | WHL                                                                                   | 2017 | Sus scrofa            | MN037494.1  |
| 129    | Porcine epidemic diarrhea virus isolate<br>CH/JXJA/2017                               | 2017 | Sus scrofa            | MF375374.1  |
| 130    | Swine enteric coronavirus strain<br>Italy/213306/2009                                 | 2009 | Sus scrofa            | NC_028806.1 |
| 131    | Alphacoronavirus sp. strain<br>VZ_AlphaCoV_20745_17                                   | 2015 | Scotophilus kuhlii    | MH687965.1  |
| 132    | Bat alphacoronavirus strain<br>BtCoV/008_16/M.bra/FIN/2016                            | 2016 | Myotis brandtii       | MN065811.1  |
| 133    | Porcine epidemic diarrhea virus isolate<br>CH/HNZZ47/2016                             | 2016 | Sus scrofa            | KX981440.1  |
| 134    | Alphacoronavirus Bat-<br>CoV/P.kuhlii/Italy/3398-19/2015                              | 2015 | Pipistrellus kuhlii   | NC_046964.1 |
| 135    | Coronavirus BtSk-AlphaCoV/GX2018C<br>Alphacoronavirus Bat-                            | 2017 | Scotophilus kuhlii    | MK211371.1  |
| 136    | CoV/P.kuhlii/Italy/206679-3/2010                                                      | 2010 | Pipistrellus kuhlii   | MH938450.1  |
| 137    | Ferret enteric coronavirus strain FECV1<br>Alphacoronavirus sp. strain                | 2015 | Mustela putorius furo | KX512809.1  |
| 138    | VZ_AlphaCoV_16715_77<br>Alphacoronavirus sp. strain                                   | 2014 | Scotophilus kuhlii    | MH687950.1  |
| 139    | VZ_AlphaCoV_17819_4<br>Hipposideros pomona bat coronavirus                            | 2014 | Scotophilus kuhlii    | MH687961.1  |
| 140    | CHB25 isolate CHB0025                                                                 | 2018 | Hipposideros larvatus | MN611525.1  |
| 141    | Alphacoronavirus sp. isolate WA1087<br>Alphacoronavirus sp. strain                    | 2018 |                       | MK472067.1  |
| 142    | VZ_AlphaCoV_16715_61<br>Alphacoronavirus sp. strain                                   | 2014 | Scotophilus kuhlii    | MH687946.1  |
| 143    | VZ_AlphaCoV_16845_64                                                                  | 2014 | Scotophilus kuhlii    | MH687957.1  |
| 144    | Myotis lucifugus coronavirus                                                          | 2010 | Myotis lucifugus      | KY799179.1  |
| 145    | Coronavirus BtSk-AlphaCoV/GX2018B                                                     | 2017 | Scotophilus kuhlii    | MK211370.1  |

|     |                                                                         |      |                          |             |
|-----|-------------------------------------------------------------------------|------|--------------------------|-------------|
| 146 | Alphacoronavirus sp. strain<br>VZ_AlphaCoV_16715_76                     | 2014 | Scotophilus kuhlii       | MH687949.1  |
| 147 | Porcine epidemic diarrhea virus isolate<br>GER/L03208/2019              |      |                          | LR812930.1  |
| 148 | Scotophilus bat coronavirus 512                                         |      |                          | NC_009657.1 |
| 149 | Alphacoronavirus sp. strain<br>VZ_AlphaCoV_20745_10                     | 2015 | Scotophilus kuhlii       | MH687964.1  |
| 150 | Alphacoronavirus sp. strain<br>VZ_AlphaCoV_16715_53                     | 2014 | Scotophilus kuhlii       | MH687944.1  |
| 151 | Alphacoronavirus sp. strain<br>VZ_AlphaCoV_16845_47                     | 2014 | Scotophilus kuhlii       | MH687955.1  |
| 152 | Alphacoronavirus sp. strain<br>VZ_AlphaCoV_16715_56                     | 2014 | Scotophilus kuhlii       | MH687945.1  |
| 153 | Alphacoronavirus sp. strain<br>VZ_AlphaCoV_16715_32                     | 2014 | Scotophilus kuhlii       | MH687937.1  |
| 154 | Coronavirus BtSk-AlphaCoV/GX2018D                                       | 2017 | Scotophilus kuhlii       | MK211372.1  |
| 155 | Alphacoronavirus sp. strain<br>VZ_AlphaCoV_16715_5                      | 2014 | Scotophilus kuhlii       | MH687943.1  |
| 156 | Alphacoronavirus sp. strain<br>VZ_AlphaCoV_16845_24                     | 2014 | Scotophilus kuhlii       | MH687954.1  |
| 157 | Alphacoronavirus sp. strain<br>VZ_AlphaCoV_16715_23                     | 2014 | Scotophilus kuhlii       | MH687934.1  |
| 158 | Alphacoronavirus sp. strain<br>VZ_AlphaCoV_16715_7                      | 2014 | Scotophilus kuhlii       | MH687948.1  |
| 159 | Coronavirus BtSk-AlphaCoV/GX2018A                                       | 2017 | Scotophilus kuhlii       | MK211369.1  |
| 160 | Alphacoronavirus sp. strain<br>VZ_AlphaCoV_16715_39_c2                  | 2014 | Scotophilus kuhlii       | MH687939.1  |
| 161 | BtMf-AlphaCoV/AH2011                                                    | 2011 | Miniopterus fuliginosus  | KJ473795.1  |
| 162 | BtMf-AlphaCoV/JX2012                                                    | 2012 | Miniopterus fuliginosus  | KJ473796.1  |
| 163 | Alphacoronavirus sp. strain<br>VZ_AlphaCoV_16715_78                     | 2014 | Scotophilus kuhlii       | MH687951.1  |
| 164 | Porcine epidemic diarrhea virus strain<br>PEDV/Belgorod/dom/2008        |      |                          | MF577027.1  |
| 165 | Miniopterus schreibersii bat coronavirus 1-<br>related isolate 161454   | 2018 | Miniopterus schreibersii | MN611524.1  |
| 166 | Alphacoronavirus sp. strain<br>VZ_AlphaCoV_16715_47_c2                  | 2014 | Scotophilus kuhlii       | MH687942.1  |
| 167 | Bat coronavirus 1A                                                      |      |                          | NC_010437.1 |
| 168 | Alphacoronavirus sp. strain<br>VZ_AlphaCoV_16715_39_c1                  | 2014 | Scotophilus kuhlii       | MH687938.1  |
| 169 | NL63-related bat coronavirus strain<br>BtKYNL63-9a                      | 2010 | Triaenops afer           | NC_032107.1 |
| 170 | Alphacoronavirus sp. strain<br>VZ_AlphaCoV_20745_6                      | 2015 | Scotophilus kuhlii       | MH687966.1  |
| 171 | Transmissible gastroenteritis virus strain<br>TGEV/USA/Illinois139/2006 | 2006 |                          | KX900396.1  |
| 172 | Feline coronavirus UU21                                                 | 2007 | Feliformia               | HQ012369.1  |
| 173 | Ferret coronavirus isolate FRCoV-NL-2010                                | 2010 | Mustela putorius         | NC_030292.1 |
| 174 | NL63-related bat coronavirus strain<br>BtKYNL63-15                      | 2008 | Triaenops afer           | KY073746.1  |
| 175 | Bat coronavirus 1B strain AFCD307                                       |      |                          | EU420137.1  |
| 176 | Feline coronavirus UU16                                                 | 2007 | Felis catus              | FJ938058.1  |
| 177 | Hipposideros bat coronavirus HKU10 isolate                              | 2010 | Chiroptera               | JQ989272.1  |

| TLC1343A |                                                                       |      |                         |             |
|----------|-----------------------------------------------------------------------|------|-------------------------|-------------|
| 178      | Rousettus bat coronavirus HKU10 isolate 175A                          | 2005 | Chiroptera              | JQ989271.1  |
| 179      | Hipposideros bat coronavirus HKU10 isolate LSH5A                      | 2005 | Chiroptera              | JQ989269.1  |
| 180      | Rousettus bat coronavirus HKU10                                       | 2005 | Chiroptera              | NC_018871.1 |
| 181      | Feline coronavirus strain HF1902                                      | 2019 | Felis catus             | MT444152.1  |
| 182      | Hipposideros pomona bat coronavirus HKU10-related isolate 160942      | 2018 | Hipposideros pomona     | MN611523.1  |
| 183      | Transmissible gastroenteritis virus strain TGEV/USA/Minnesota138/2006 | 2006 |                         | KX900395.1  |
| 184      | Ferret coronavirus genomic RNA, strain: ferret063                     | 2016 | Mustela putorius furo   | LC215871.1  |
| 185      | Ferret coronavirus genomic RNA, strain: FRCov4370                     | 2013 | Mustela putorius furo   | LC119077.1  |
| 186      | Transmissible gastroenteritis virus strain H16                        | 1973 | Sus scrofa              | FJ755618.2  |
| 187      | Feline coronavirus isolate Cat 1 Karlslunde                           | 2015 | Felis catus             | KX722530.1  |
| 188      | Lucheng Rn rat coronavirus isolate Ruian-83                           | 2014 | Rattus norvegicus       | MT820626.1  |
| 189      | Transmissible gastroenteritis virus strain TGEV AHHF                  | 2015 | Sus scrofa              | KX499468.1  |
| 190      | Feline coronavirus strain DF-2                                        |      |                         | DQ286389.1  |
| 191      | NL63-related bat coronavirus strain BtKYNL63-9b                       | 2010 | Triaenops afer          | NC_048216.1 |
| 192      | BtMf-AlphaCoV/HeN2013                                                 | 2013 | Miniopterus fuliginosus | KJ473800.1  |
| 193      | Miniopterus pusillus bat coronavirus HKU8-related isolate 6610        | 2018 | Miniopterus pusillus    | MN611518.1  |
| 194      | BtMf-AlphaCoV/HuB2013                                                 | 2013 | Miniopterus fuliginosus | KJ473798.1  |
| 195      | BtMf-AlphaCoV/GD2012                                                  | 2012 | Miniopterus fuliginosus | KJ473797.1  |
| 196      | Lucheng Rn rat coronavirus isolate Lucheng-19                         | 2013 | Rattus norvegicus       | NC_032730.1 |
| 197      | BtMf-AlphaCoV/FJ2012                                                  | 2012 | Miniopterus fuliginosus | KJ473799.1  |
| 198      | Bat coronavirus HKU8                                                  |      |                         | NC_010438.1 |
| 199      | Minacovirus mink/NLD/2020/NT_4                                        | 2020 | Neovison vison          | MW248736.1  |
| 200      | Feline coronavirus strain FCoV/NTU156/P/2007                          | 2007 | Felis catus             | GQ152141.1  |
| 201      | Mink coronavirus 1 strain MCoV1/11917-2/DK/2015                       | 2015 | Neovison vison          | MN535736.1  |
| 202      | Mink coronavirus 1 strain MCoV1/11918-1/DK/2015                       | 2015 | Neovison vison          | MN535737.1  |
| 203      | Mink coronavirus strain WD1133                                        | 1998 | Neovison vison          | HM245926.1  |
| 204      | Alphacoronavirus Mink/China/1/2016                                    | 2016 | Mustela lutreola        | MF113046.1  |
| 205      | Mink coronavirus strain WD1127                                        | 1998 | Neovison vison          | NC_023760.1 |
| 206      | Canine coronavirus isolate HLJ-073                                    | 2016 | Canis lupus familiaris  | KY063618.2  |
| 207      | Feline coronavirus isolate 27C                                        | 2013 | Felis catus             | KP143507.1  |
| 208      | Feline coronavirus strain WSU 79-1683                                 |      |                         | JN634064.1  |
| 209      | Feline infectious peritonitis virus strain DF-2                       |      | Felis catus             | JQ408981.1  |
| 210      | Bat alphacoronavirus isolate AMA_L_F                                  | 2015 | Desmodus rotundus       | MT663548.1  |
| 211      | Coronavirus BtRs-AlphaCoV/YN2018                                      | 2017 | Cynopterus sphinx       | MK211373.1  |
| 212      | Feline coronavirus strain Felis catus/NLD/UU88/2010                   | 2010 | Felis catus             | KF530123.1  |
| 213      | Feline coronavirus UU3                                                | 1998 | Felis catus             | FJ938061.1  |
| 214      | Feline Alphacoronavirus 1 strain FCoV-SB22                            | 2015 | Felis catus             | MH817484.1  |
| 215      | Lucheng Rn rat coronavirus isolate Lijiang-71                         | 2014 | Eothenomys miletus      | MT820627.1  |

|     |                                              |      |                        |            |
|-----|----------------------------------------------|------|------------------------|------------|
| 216 | Feline coronavirus strain FIPV 79-1146       |      | Felis catus            | DQ010921.1 |
| 217 | Feline coronavirus isolate UG-FH8            | 2015 | Felis catus            | KX722529.1 |
|     | Rhinolophus bat coronavirus HKU32 strain     |      |                        |            |
| 218 | TLC26A                                       | 2015 | Rhinolophus sinicus    | MK720945.1 |
| 219 | Feline coronavirus UU17                      | 2007 | Feliformia             | HQ012367.1 |
| 220 | Feline coronavirus UU54                      | 2010 | Felis catus            | JN183883.1 |
| 221 | Feline coronavirus RM                        | 2002 | Felis catus            | FJ938051.1 |
| 222 | Feline coronavirus UU40                      | 2008 | Felis catus            | HQ392469.1 |
| 223 | Feline coronavirus UU30                      | 2008 | Feliformia             | HQ392472.1 |
| 224 | Feline coronavirus isolate QS                | 2018 | Felis catus            | MW030108.1 |
|     | Feline coronavirus isolate                   |      |                        |            |
| 225 | Cat3_day28_deletion                          | 2013 | Felis catus            | KU215427.1 |
| 226 | Feline coronavirus UU47                      | 2010 | Felis catus            | JN183882.1 |
| 227 | Feline coronavirus UU20                      | 2007 | Feliformia             | HQ392471.1 |
| 228 | Feline coronavirus UU18                      | 2007 | Feliformia             | HQ012368.1 |
| 229 | Feline coronavirus UU5                       | 2007 | Felis catus            | FJ938056.1 |
| 230 | Feline coronavirus UU19                      | 2007 | Feliformia             | HQ392470.1 |
| 231 | Feline coronavirus isolate Black             |      |                        | EU186072.1 |
| 232 | Feline coronavirus isolate inoculum          | 2013 | Felis catus            | KU215419.1 |
| 233 | Canine coronavirus isolate HLJ-072           | 2016 | Canis lupus familiaris | KY063617.1 |
|     | Feline coronavirus UU22 isolate TCVSP-       |      |                        |            |
| 234 | ROTTIER-00022                                | 2007 | Feliformia             | GU553361.1 |
| 235 | Feline coronavirus UU24                      | 2008 | Feliformia             | HQ012370.1 |
| 236 | Feline coronavirus UU9                       | 2007 | Felis catus            | FJ938062.1 |
| 237 | Feline coronavirus UU4                       | 2007 | Felis catus            | FJ938054.1 |
| 238 | Canine coronavirus strain A76                | 1976 | Canis lupus familiaris | JN856008.2 |
| 239 | Feline coronavirus UU31                      | 2008 | Feliformia             | HQ012371.1 |
| 240 | Feline coronavirus UU15                      | 2007 | Felis catus            | FJ938057.1 |
| 241 | Feline coronavirus UU7                       | 2007 | Felis catus            | FJ938053.1 |
| 242 | Feline coronavirus strain FCoV C1Je          |      |                        | DQ848678.1 |
| 243 | Canine coronavirus strain CB/05              | 2005 | Canis lupus familiaris | KP981644.1 |
| 244 | Feline coronavirus UU8                       | 2007 | Felis catus            | FJ938055.1 |
| 245 | Feline coronavirus isolate XXN               | 2018 | Felis catus            | MN165107.1 |
| 246 | Feline coronavirus isolate Felix             | 2012 | Felis catus            | MG893511.1 |
| 247 | Feline coronavirus isolate SD                | 2018 | Felis catus            | MW030110.1 |
| 248 | Feline coronavirus strain ZJU1709            | 2017 | Felis catus            | MT239440.1 |
| 249 | Feline coronavirus strain HLJ/DQ/2016/01     | 2016 | Felis catus            | KY292377.1 |
| 250 | Feline coronavirus UU11                      | 2007 | Felis catus            | FJ938052.1 |
| 251 | Canine coronavirus strain 2020/7             | 2020 | Canis lupus familiaris | MT906865.1 |
| 252 | Feline coronavirus isolate 79-1146_CA        | 2018 | Felis catus            | MW030109.1 |
| 253 | Feline coronavirus strain ZJU1617            | 2016 | Felis catus            | MT239439.1 |
| 254 | Feline coronavirus strain DF-2 R3i           |      | Felis catus            | JQ408980.1 |
|     | Canine coronavirus strain                    |      |                        |            |
| 255 | CCoV/NTU336/F/2008                           | 2008 | Canis lupus familiaris | GQ477367.1 |
| 256 | Canine coronavirus strain TN-449             |      | Canis lupus familiaris | JQ404410.1 |
| 257 | Canine coronavirus strain 2020/15            | 2020 | Canis lupus familiaris | MT906864.1 |
| 258 | Feline coronavirus strain HLJ/HRB/2016/10    | 2016 | Felis catus            | KY566209.1 |
| 259 | Canine coronavirus strain 1-71               |      | Canis lupus familiaris | JQ404409.1 |
| 260 | Alphacoronavirus 1 strain 23/03              | 2003 |                        | KP849472.1 |
| 261 | Bat coronavirus isolate Anlong-57            | 2013 | Myotis davidii         | KY770851   |
| 262 | Porcine epidemic diarrhea virus strain CV777 |      | Sus scrofa domesticus  | NC_003436  |
|     | Transmissible gastroenteritis virus strain   |      |                        |            |
| 263 | Purdue                                       |      | Sus scrofa domesticus  | NC_038861  |



|     |                                                    |      |             |           |  |
|-----|----------------------------------------------------|------|-------------|-----------|--|
|     | Feline infectious peritonitis virus strain 79-1146 |      |             |           |  |
| 264 |                                                    |      | Felis catus | NC_002306 |  |
|     | Camel alphacoronavirus isolate                     |      |             |           |  |
| 265 | camel/Riyadh/Ry141/2015                            | 2015 | Camelus     | NC_028752 |  |
